# Supplementary figures and images for: The Amino Acid Transporter Mct10/Tat1 Is Important to Maintain the TSH Receptor at Its Canonical Basolateral Localization and Assures Regular Turnover of Thyroid Follicle Cells in Male Mice
Source: MDPI journal article supplement (doi:10.3390/ijms22115776), 2021-05-28

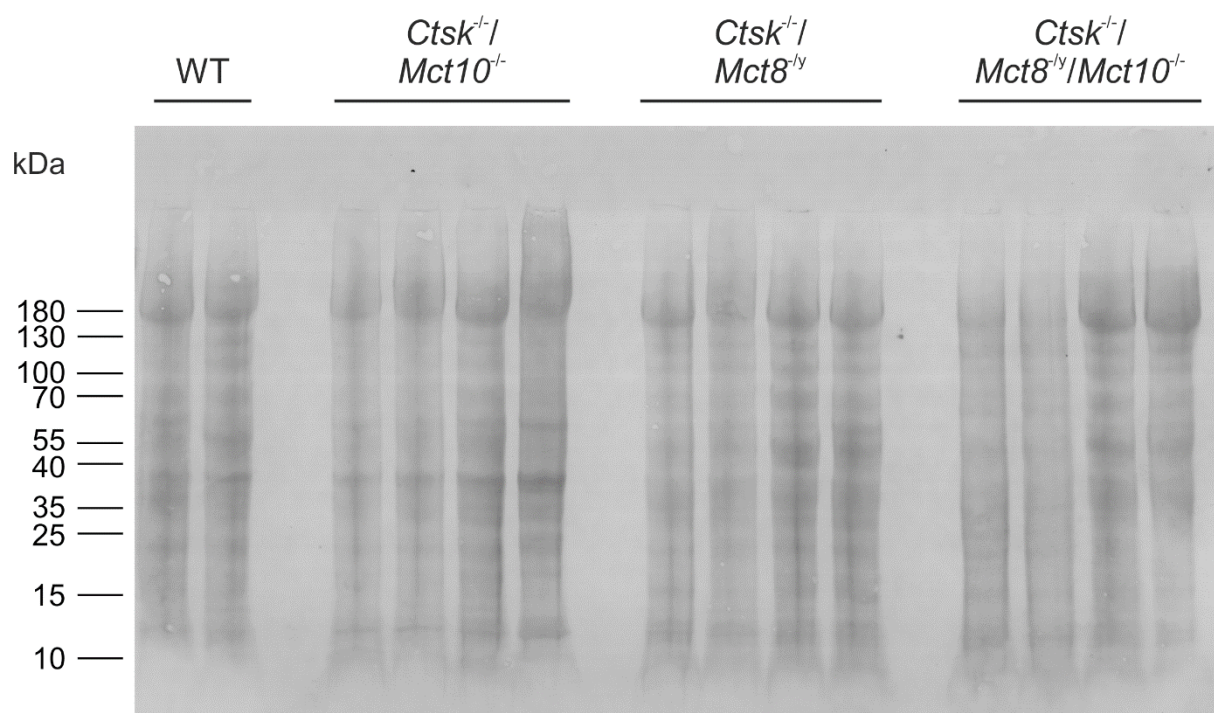

Supplementary Figure S1. Ponceau-stained loading control corresponding to Figure 3A.

Supplement: s1 [file s1]
